# Supplementary material for: Challenges to implementing bottom-up flood risk decision analysis frameworks: how strong are social networks of flooding professionals?
Source: Copernicus journal article supplement (doi:10.5194/hess-22-5657-2018), 2018-11-01
Supplement: Supplementary file 1 [file hess-22-5657-2018-supplement.zip]

Archive with 3 entries (3 files):
- TC_FloodSurvey_RawData_060818.xlsx
- Survey_060818.pdf
- hess-22-5657-2018-supplement-title-page.pdf
