# Supplementary material for: Challenges to implementing bottom-up flood risk decision analysis frameworks: how strong are social networks of flooding professionals?
Source: Copernicus journal article supplement (doi:10.5194/hess-22-5657-2018), 2018-11-01
Supplement: Supplementary file 1 [file hess-22-5657-2018-supplement.zip › hess-22-5657-2018-supplement-title-page.pdf]

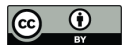

## *Supplement of*

# **Challenges to implementing bottom-up flood risk decision analysis frameworks: how strong are social networks of flooding professionals?**

**James O. Knighton et al.**

*Correspondence to:* James O. Knighton ([jok8@cornell.edu](mailto:jok8@cornell.edu))

- [hess-22-5657-2018-supplement-title-page.pdf](#)
- [Survey\\_060818.pdf](#)
- [TC\\_FloodSurvey\\_RawData\\_060818.xlsx](#)

The copyright of individual parts of the supplement might differ from the CC BY 4.0 License.
