# Supplementary material for: Challenges to implementing bottom-up flood risk decision analysis frameworks: how strong are social networks of flooding professionals?
Source: Copernicus journal article supplement (doi:10.5194/hess-22-5657-2018), 2018-11-01
Supplement: Supplementary file 1 [file TC_FloodSurvey_RawData_060818.xlsx]

## Sheet: TC_FloodSurvey_RawData_060818
Response ID	Introduction and Consent Statement â€‹EMC Flood Survey Recent flooding within Tompkins County has prompted both the City of Ithaca and Tompkins County Planning Departments to collaborate and build a more complete picture of flooding within our county. As the Tompkins County Environmental Management Council, we write seeking your participation in this initiative. You have been identified as a comm…	How do you contribute to flood resiliency? Please choose the option that most accurately describes your role in the community. - Selected Choice	What is a flood to you? Please check all that apply. - Selected Choice	What is a flood to you? Please check all that apply. - Other (explain) - Text	â€‹If you donâ€™t know about flooding in your local area, do you know of a source (person/ place/ website) where you could get this information?	Does your community keep records of historical floods?	â€‹Do you happen to know of any historical flooding events that occurred within your communityâ€™s geographical area? If so please enter the information below for each flooding event. If you do not recall the exact value for each question, please enter an approximate. You may add as many of these events as you wish by responding "Yes" to the last question on this page. Otherwise, answer "No" to p…	â€‹Do you happen to know of any historical flooding events that occurred within your communityâ€™s geographical area? If so please enter the information below for each flooding event. If you do not recall the exact value for each question, please enter an approximate. You may add as many of these events as you wish by responding "Yes" to the last question on this page. Otherwise, answer "No" to p…	â€‹Do you happen to know of any historical flooding events that occurred within your communityâ€™s geographical area? If so please enter the information below for each flooding event. If you do not recall the exact value for each question, please enter an approximate. You may add as many of these events as you wish by responding "Yes" to the last question on this page. Otherwise, answer "No" to p…	â€‹Do you happen to know of any historical flooding events that occurred within your communityâ€™s geographical area? If so please enter the information below for each flooding event. If you do not recall the exact value for each question, please enter an approximate. You may add as many of these events as you wish by responding "Yes" to the last question on this page. Otherwise, answer "No" to p…	â€‹Do you happen to know of any historical flooding events that occurred within your communityâ€™s geographical area? If so please enter the information below for each flooding event. If you do not recall the exact value for each question, please enter an approximate. You may add as many of these events as you wish by responding "Yes" to the last question on this page. Otherwise, answer "No" to p…	What was the flooding damage caused by the storm. Check all that apply. - Selected Choice	What was the flooding damage caused by the storm. Check all that apply. - something else (please list) - Text	Would you like to add another flood event?	â€‹Do you happen to know of any historical flooding events that occurred within your communityâ€™s geographical area? If so please enter the information below for each flooding event. If you do not recall the exact value for each question, please enter an approximate. You may add as many of these events as you wish by responding "Yes" to the last question on this page. Otherwise, answer "No" to p…	â€‹Do you happen to know of any historical flooding events that occurred within your communityâ€™s geographical area? If so please enter the information below for each flooding event. If you do not recall the exact value for each question, please enter an approximate. You may add as many of these events as you wish by responding "Yes" to the last question on this page. Otherwise, answer "No" to p…	â€‹Do you happen to know of any historical flooding events that occurred within your communityâ€™s geographical area? If so please enter the information below for each flooding event. If you do not recall the exact value for each question, please enter an approximate. You may add as many of these events as you wish by responding "Yes" to the last question on this page. Otherwise, answer "No" to p…	â€‹Do you happen to know of any historical flooding events that occurred within your communityâ€™s geographical area? If so please enter the information below for each flooding event. If you do not recall the exact value for each question, please enter an approximate. You may add as many of these events as you wish by responding "Yes" to the last question on this page. Otherwise, answer "No" to p…	â€‹Do you happen to know of any historical flooding events that occurred within your communityâ€™s geographical area? If so please enter the information below for each flooding event. If you do not recall the exact value for each question, please enter an approximate. You may add as many of these events as you wish by responding "Yes" to the last question on this page. Otherwise, answer "No" to p…	What was the flooding damage caused by the storm. Check all that apply. - Selected Choice	What was the flooding damage caused by the storm. Check all that apply. - something else (please list) - Text	Would you like to add another flood event?	â€‹Do you happen to know of any historical flooding events that occurred within your communityâ€™s geographical area? If so please enter the information below for each flooding event. If you do not recall the exact value for each question, please enter an approximate. You may add as many of these events as you wish by responding "Yes" to the last question on this page. Otherwise, answer "No" to p…	â€‹Do you happen to know of any historical flooding events that occurred within your communityâ€™s geographical area? If so please enter the information below for each flooding event. If you do not recall the exact value for each question, please enter an approximate. You may add as many of these events as you wish by responding "Yes" to the last question on this page. Otherwise, answer "No" to p…	â€‹Do you happen to know of any historical flooding events that occurred within your communityâ€™s geographical area? If so please enter the information below for each flooding event. If you do not recall the exact value for each question, please enter an approximate. You may add as many of these events as you wish by responding "Yes" to the last question on this page. Otherwise, answer "No" to p…	â€‹Do you happen to know of any historical flooding events that occurred within your communityâ€™s geographical area? If so please enter the information below for each flooding event. If you do not recall the exact value for each question, please enter an approximate. You may add as many of these events as you wish by responding "Yes" to the last question on this page. Otherwise, answer "No" to p…	â€‹Do you happen to know of any historical flooding events that occurred within your communityâ€™s geographical area? If so please enter the information below for each flooding event. If you do not recall the exact value for each question, please enter an approximate. You may add as many of these events as you wish by responding "Yes" to the last question on this page. Otherwise, answer "No" to p…	What was the flooding damage caused by the storm. Check all that apply. - Selected Choice	What was the flooding damage caused by the storm. Check all that apply. - something else (please list) - Text	Would you like to add another flood event?	â€‹Do you happen to know of any historical flooding events that occurred within your communityâ€™s geographical area? If so please enter the information below for each flooding event. If you do not recall the exact value for each question, please enter an approximate. You may add as many of these events as you wish by responding "Yes" to the last question on this page. Otherwise, answer "No" to p…	â€‹Do you happen to know of any historical flooding events that occurred within your communityâ€™s geographical area? If so please enter the information below for each flooding event. If you do not recall the exact value for each question, please enter an approximate. You may add as many of these events as you wish by responding "Yes" to the last question on this page. Otherwise, answer "No" to p…	â€‹Do you happen to know of any historical flooding events that occurred within your communityâ€™s geographical area? If so please enter the information below for each flooding event. If you do not recall the exact value for each question, please enter an approximate. You may add as many of these events as you wish by responding "Yes" to the last question on this page. Otherwise, answer "No" to p…	â€‹Do you happen to know of any historical flooding events that occurred within your communityâ€™s geographical area? If so please enter the information below for each flooding event. If you do not recall the exact value for each question, please enter an approximate. You may add as many of these events as you wish by responding "Yes" to the last question on this page. Otherwise, answer "No" to p…	â€‹Do you happen to know of any historical flooding events that occurred within your communityâ€™s geographical area? If so please enter the information below for each flooding event. If you do not recall the exact value for each question, please enter an approximate. You may add as many of these events as you wish by responding "Yes" to the last question on this page. Otherwise, answer "No" to p…	What was the flooding damage caused by the storm. Check all that apply. - Selected Choice	What was the flooding damage caused by the storm. Check all that apply. - something else (please list) - Text	Would you like to add another flood event?	â€‹Do you happen to know of any historical flooding events that occurred within your communityâ€™s geographical area? If so please enter the information below for each flooding event. If you do not recall the exact value for each question, please enter an approximate. You may add as many of these events as you wish by responding "Yes" to the last question on this page. Otherwise, answer "No" to p…	â€‹Do you happen to know of any historical flooding events that occurred within your communityâ€™s geographical area? If so please enter the information below for each flooding event. If you do not recall the exact value for each question, please enter an approximate. You may add as many of these events as you wish by responding "Yes" to the last question on this page. Otherwise, answer "No" to p…	â€‹Do you happen to know of any historical flooding events that occurred within your communityâ€™s geographical area? If so please enter the information below for each flooding event. If you do not recall the exact value for each question, please enter an approximate. You may add as many of these events as you wish by responding "Yes" to the last question on this page. Otherwise, answer "No" to p…	â€‹Do you happen to know of any historical flooding events that occurred within your communityâ€™s geographical area? If so please enter the information below for each flooding event. If you do not recall the exact value for each question, please enter an approximate. You may add as many of these events as you wish by responding "Yes" to the last question on this page. Otherwise, answer "No" to p…	â€‹Do you happen to know of any historical flooding events that occurred within your communityâ€™s geographical area? If so please enter the information below for each flooding event. If you do not recall the exact value for each question, please enter an approximate. You may add as many of these events as you wish by responding "Yes" to the last question on this page. Otherwise, answer "No" to p…	What was the flooding damage caused by the storm. Check all that apply. - Selected Choice	What was the flooding damage caused by the storm. Check all that apply. - something else (please list) - Text	Would you like to add another flood event?	â€‹Do you happen to know of any historical flooding events that occurred within your communityâ€™s geographical area? If so please enter the information below for each flooding event. If you do not recall the exact value for each question, please enter an approximate. You may add as many of these events as you wish by responding "Yes" to the last question on this page. Otherwise, answer "No" to p…	â€‹Do you happen to know of any historical flooding events that occurred within your communityâ€™s geographical area? If so please enter the information below for each flooding event. If you do not recall the exact value for each question, please enter an approximate. You may add as many of these events as you wish by responding "Yes" to the last question on this page. Otherwise, answer "No" to p…	â€‹Do you happen to know of any historical flooding events that occurred within your communityâ€™s geographical area? If so please enter the information below for each flooding event. If you do not recall the exact value for each question, please enter an approximate. You may add as many of these events as you wish by responding "Yes" to the last question on this page. Otherwise, answer "No" to p…
R_3lSK5ha7jeLWv5q	I agree to all of the above and wish to proceed	Community planning	loss of life,damage to private structures (homes, businesses),displacement of people,damage to vehicles,damage to public property (roads),flooded road crossings,flow of water across private property,backed up culverts and inlets,a loss of stream side vegetation & trees, streams flowing in the floodplain (i.e. out of bank, within stream side vegetated areas),,substantial erosion within a stream (i…		Yes									No
R_ugK5ZqLWoXF4jx7	I agree to all of the above and wish to proceed	Community planning	loss of life,damage to private structures (homes, businesses),displacement of people,damage to vehicles,damage to public property (roads),flooded road crossings,flow of water across private property,backed up culverts and inlets,a loss of stream side vegetation & trees, streams flowing in the floodplain (i.e. out of bank, within stream side vegetated areas),		I have a good understanding of flooding		City, near S Albany and N. Titus	1981?	?	6 Mile creek	Spring? Fall?	flooded road crossings,flow of water across private property,backed up culverts and inlets,streams flowing in the floodplain (i.e. out of bank, within stream-side vegetated areas)		Yes	City, near Thompson Park	? 5 years ago?	/	Cascadilla	Winter?	damage to private structures (homes, businesses),damage to public property (roads),flooded road crossings,flow of water across private property,streams flowing in the floodplain (i.e. out of bank, within stream-side vegetated areas)		Yes	Fairgrounds memorial parkway	1990s?	?	Cayuga Inlet overflow, high lake levels	?	damage to private structures (homes, businesses),displacement of people,damage to vehicles,damage to public property (roads),flooded road crossings,flow of water across private property,backed up culverts and inlets,streams flowing in the floodplain (i.e. out of bank, within stream-side vegetated areas)		Yes		1972, hurrican agnes		Fall Creek	https://pubs.usgs.gov/wri/1975/0034/report.pdf	something else (please list)	I wasn't here at the time.	No
R_1rcqqgf3LU8Ph1C	I agree to all of the above and wish to proceed	Community planning	damage to private structures (homes, businesses),displacement of people,damage to vehicles,damage to public property (roads),flooded road crossings,flow of water across private property,a loss of stream side vegetation & trees, streams flowing in the floodplain (i.e. out of bank, within stream side vegetated areas),,any flow in a stream above normal levels		I have a good understanding of flooding		work region-wide, dozens of places!	many dates	many high water marks	many	all seasons	something else (please list)	See above	No
R_2CEzdZl97aynjx9	I agree to all of the above and wish to proceed	Community planning	loss of life,damage to private structures (homes, businesses),displacement of people,damage to vehicles,damage to public property (roads),flooded road crossings,backed up culverts and inlets,a loss of stream side vegetation & trees, streams flowing in the floodplain (i.e. out of bank, within stream side vegetated areas),,substantial erosion within a stream (incision),Other (explain)	Most of these are impacts of floods. A flood to me is when water negatively impacts natural and human resources.	I have a good understanding of flooding	Yes	I believe these are listed in the Hazard Mitigation Plan for Tompkins County					damage to private structures (homes, businesses),damage to public property (roads),flooded road crossings,flow of water across private property,backed up culverts and inlets,a loss of stream-side vegetation & trees,substantial erosion within a stream (incision)		No
R_3oTLwmbbSBZMZji	I agree to all of the above and wish to proceed	Community planning	loss of life,damage to private structures (homes, businesses),displacement of people,damage to vehicles,damage to public property (roads),flooded road crossings,backed up culverts and inlets,a loss of stream side vegetation & trees, streams flowing in the floodplain (i.e. out of bank, within stream side vegetated areas),,substantial erosion within a stream (incision)		I have a good understanding of flooding		Brown Road / 34 & 96	2015-06-14		Cayuga Inlet watershed	summer	damage to private structures (homes, businesses),damage to public property (roads),flooded road crossings,substantial erosion within a stream (incision)		No
R_33pul3XecBvniiR	I agree to all of the above and wish to proceed	Community planning	loss of life,damage to private structures (homes, businesses),displacement of people,damage to vehicles,damage to public property (roads),flooded road crossings,flow of water across private property,backed up culverts and inlets,a loss of stream side vegetation & trees, streams flowing in the floodplain (i.e. out of bank, within stream side vegetated areas),,substantial erosion within a stream (i…		Yes	Yes	village of dryden	2017-07-01				damage to private structures (homes, businesses),damage to public property (roads),flooded road crossings,flow of water across private property,backed up culverts and inlets,a loss of stream-side vegetation & trees,streams flowing in the floodplain (i.e. out of bank, within stream-side vegetated areas),substantial erosion within a stream (incision)		Yes								No
R_33g3A8oDjM5V99x	I agree to all of the above and wish to proceed	Community planning	loss of life,damage to private structures (homes, businesses),displacement of people,damage to vehicles,damage to public property (roads),flooded road crossings,a loss of stream side vegetation & trees, streams flowing in the floodplain (i.e. out of bank, within stream side vegetated areas),,substantial erosion within a stream (incision)		I have a good understanding of flooding		Fish Road	2016			summer	damage to public property (roads),flow of water across private property,backed up culverts and inlets,substantial erosion within a stream (incision)		No
R_1dvqllm7lECtIZC	I agree to all of the above and wish to proceed	Community planning	loss of life,damage to private structures (homes, businesses),displacement of people,damage to vehicles,damage to public property (roads),flooded road crossings,flow of water across private property,backed up culverts and inlets,a loss of stream side vegetation & trees, streams flowing in the floodplain (i.e. out of bank, within stream side vegetated areas),,substantial erosion within a stream (i…		I have a good understanding of flooding	Yes	Fall Creek area	1972		Fall Creek	Fall	damage to private structures (homes, businesses),damage to public property (roads),flooded road crossings,flow of water across private property,backed up culverts and inlets,any flow in a stream above normal levels		No
R_31pAGtLb00Exkle	I agree to all of the above and wish to proceed	Education and outreach	flooded road crossings,backed up culverts and inlets,substantial erosion within a stream (incision)		Yes					cascadilla	spring	damage to private structures (homes, businesses),flooded road crossings,flow of water across private property,backed up culverts and inlets,substantial erosion within a stream (incision)		No
R_w5ZoWw3XoQMSuYh	I agree to all of the above and wish to proceed	Education and outreach	any flow in a stream above normal levels		I have a good understanding of flooding	Yes	Thoughout Tompkins County	1935		all	intense ,large scale precipitation event	loss of life,damage to private structures (homes, businesses),displacement of people,damage to vehicles,damage to public property (roads),flooded road crossings,flow of water across private property,backed up culverts and inlets,a loss of stream-side vegetation & trees,streams flowing in the floodplain (i.e. out of bank, within stream-side vegetated areas),substantial erosion within a stream (inc…		No
R_5h7L4KdckIUTW0N	I agree to all of the above and wish to proceed	Education and outreach	any flow in a stream above normal levels		Yes		Brown Rd. West Danby	2015-06-14		Cayuga Inlet	Late Spring	damage to private structures (homes, businesses),damage to public property (roads),flooded road crossings,flow of water across private property,a loss of stream-side vegetation & trees,streams flowing in the floodplain (i.e. out of bank, within stream-side vegetated areas),substantial erosion within a stream (incision)		No
R_1hNlguq1gPFZvCq	I agree to all of the above and wish to proceed	Education and outreach	loss of life,damage to private structures (homes, businesses),displacement of people,damage to vehicles,damage to public property (roads),flooded road crossings,flow of water across private property,backed up culverts and inlets,a loss of stream side vegetation & trees, streams flowing in the floodplain (i.e. out of bank, within stream side vegetated areas),,substantial erosion within a stream (i…		Yes	Yes	Six Mile Creek Titus Flats	1993?	Water slapping at bottom of Albany St. bridge	Six Mile Creek	January thaw (winter)	damage to public property (roads),flooded road crossings,flow of water across private property,backed up culverts and inlets,streams flowing in the floodplain (i.e. out of bank, within stream-side vegetated areas),substantial erosion within a stream (incision)		No
R_SVLMW9gmUHKOxJ7	I agree to all of the above and wish to proceed	Education and outreach	loss of life,damage to private structures (homes, businesses),displacement of people,damage to vehicles,damage to public property (roads),flooded road crossings,substantial erosion within a stream (incision)		Yes	Yes	Hanshaw and Warren	1995		Small stream by our house overflowed	Spring/summer	damage to private structures (homes, businesses),flooded road crossings,flow of water across private property,backed up culverts and inlets		No
R_32JjZQDg9prZnLS	I agree to all of the above and wish to proceed	Education and outreach	loss of life,damage to private structures (homes, businesses),displacement of people,damage to vehicles,damage to public property (roads),flooded road crossings,flow of water across private property,backed up culverts and inlets		Yes	Yes								No
R_232eS9FCrvcFKAc	I agree to all of the above and wish to proceed	Education and outreach	damage to private structures (homes, businesses),displacement of people,damage to public property (roads),flooded road crossings,a loss of stream side vegetation & trees, streams flowing in the floodplain (i.e. out of bank, within stream side vegetated areas),,substantial erosion within a stream (incision)		I have a good understanding of flooding		yes	1972, 2006	yes	head waters/6-mile	mid-summer, late spring	damage to public property (roads),flooded road crossings,flow of water across private property,backed up culverts and inlets,a loss of stream-side vegetation & trees,streams flowing in the floodplain (i.e. out of bank, within stream-side vegetated areas),substantial erosion within a stream (incision),any flow in a stream above normal levels		No
R_3hh9y3E5NPH3sKm	I agree to all of the above and wish to proceed	Education and outreach
R_2TvjD7GvIiN8xVH	I agree to all of the above and wish to proceed	Local government leadership	loss of life,damage to private structures (homes, businesses),displacement of people,damage to vehicles,damage to public property (roads),flooded road crossings,flow of water across private property,backed up culverts and inlets,a loss of stream side vegetation & trees, streams flowing in the floodplain (i.e. out of bank, within stream side vegetated areas),,substantial erosion within a stream (i…		I have a good understanding of flooding	Yes	village of lansing	2017-07-01			summer	damage to private structures (homes, businesses),damage to vehicles,damage to public property (roads),flooded road crossings,flow of water across private property,backed up culverts and inlets,a loss of stream-side vegetation & trees,streams flowing in the floodplain (i.e. out of bank, within stream-side vegetated areas),substantial erosion within a stream (incision),minor erosion within a stream		No
R_3D9RUk3bw1uVFhD	I agree to all of the above and wish to proceed	Local government leadership	loss of life,damage to private structures (homes, businesses),displacement of people,damage to public property (roads),a loss of stream side vegetation & trees, streams flowing in the floodplain (i.e. out of bank, within stream side vegetated areas),		I have a good understanding of flooding	Yes	Rt 89 and Taughannock Creek	1930s		Taughannock Creek	Summer	damage to public property (roads)		Yes	Ulysses lakeshore, Maplewood Point	Various	Not sure	Cayuga Lake	spring/summer	damage to private structures (homes, businesses)		No
R_33p955kZLMV6yCW	I agree to all of the above and wish to proceed	Local government leadership	loss of life,displacement of people,damage to public property (roads),flooded road crossings,a loss of stream side vegetation & trees, streams flowing in the floodplain (i.e. out of bank, within stream side vegetated areas),,substantial erosion within a stream (incision),any flow in a stream above normal levels,Other (explain)	any flow exceeding a 100yr or greater storm recurrence interval	I have a good understanding of flooding	Yes	Banks Road - Town of Caroline	2011	USGS Gauge	Sixmile Creek	Late Summer/Early Fall	damage to public property (roads)		Yes	Trumbulls Corners Road	2013?		Enfield Creek	Summer	damage to public property (roads),a loss of stream-side vegetation & trees,substantial erosion within a stream (incision),something else (please list)	Sediment Deposition in Stream channel	Yes	Horton Road - Town of Newfield	2015?		Cayuga Inlet	Summer	damage to private structures (homes, businesses),displacement of people,damage to vehicles,damage to public property (roads),flooded road crossings,flow of water across private property,backed up culverts and inlets,a loss of stream-side vegetation & trees,streams flowing in the floodplain (i.e. out of bank, within stream-side vegetated areas),substantial erosion within a stream (incision),minor …		Yes	Shelter Valley Road	Recurring		Cayuga Inlet		damage to private structures (homes, businesses),displacement of people,flow of water across private property,backed up culverts and inlets,streams flowing in the floodplain (i.e. out of bank, within stream-side vegetated areas)		Yes								No
R_3nGgpcPejOS92Xv	I agree to all of the above and wish to proceed	Local government leadership	loss of life,damage to private structures (homes, businesses),displacement of people,damage to vehicles,damage to public property (roads),flooded road crossings,flow of water across private property,backed up culverts and inlets,a loss of stream side vegetation & trees, streams flowing in the floodplain (i.e. out of bank, within stream side vegetated areas),,substantial erosion within a stream (i…		Yes		Adjacent to stream beds throughout City of Ithaca. Also down hillsides towards the city.	Numerous, particularly bad in 1970s and past few years, increasing	On houses downtown		Winter and spring	damage to private structures (homes, businesses),displacement of people,damage to public property (roads),flooded road crossings,flow of water across private property,backed up culverts and inlets,a loss of stream-side vegetation & trees,streams flowing in the floodplain (i.e. out of bank, within stream-side vegetated areas),substantial erosion within a stream (incision),minor erosion within a st…		No
R_3HMncQU4s9V9mCw	I agree to all of the above and wish to proceed	Local government leadership	loss of life,damage to private structures (homes, businesses),displacement of people,damage to public property (roads),flooded road crossings		Yes	No								No
R_3ilCMp6meHCM1X2	I agree to all of the above and wish to proceed	Local government leadership	loss of life,damage to private structures (homes, businesses),displacement of people,damage to vehicles,damage to public property (roads),flooded road crossings,flow of water across private property,backed up culverts and inlets,a loss of stream side vegetation & trees, streams flowing in the floodplain (i.e. out of bank, within stream side vegetated areas),,substantial erosion within a stream (i…		I have a good understanding of flooding		Village of Dryden	1935,	Flooded buildings	Virgil, Lake, and Egypt Creeks, sidehill streams	Summer	loss of life,damage to private structures (homes, businesses),displacement of people,damage to vehicles,damage to public property (roads),flooded road crossings,flow of water across private property,backed up culverts and inlets,a loss of stream-side vegetation & trees,streams flowing in the floodplain (i.e. out of bank, within stream-side vegetated areas),substantial erosion within a stream (inc…	dislodging high risk trees along creeks	Yes	Village of Dryden	Otober, 1981	Flooded Buildings	Virgil, Lake, and Egypt Creeks, sidehill streams	Fall	damage to private structures (homes, businesses),displacement of people,damage to vehicles,damage to public property (roads),flooded road crossings,flow of water across private property,backed up culverts and inlets,a loss of stream-side vegetation & trees,streams flowing in the floodplain (i.e. out of bank, within stream-side vegetated areas),substantial erosion within a stream (incision),any fl…		Yes	Route 13, down and through City of Ithaca	mid 1970's (1975) Hurricane Agnes	Cascadilla Creek flooded over Cascadilla Avenue and flooded basements.	Fall Creek, Cascadilla Creek	Summer	damage to private structures (homes, businesses),damage to vehicles,damage to public property (roads),flooded road crossings,flow of water across private property,backed up culverts and inlets,a loss of stream-side vegetation & trees,streams flowing in the floodplain (i.e. out of bank, within stream-side vegetated areas),substantial erosion within a stream (incision),any flow in a stream above no…		Yes	City of Ithaca, Cascadilla Creek	2015?	Over banks Willow Avenue area	Cascadilla Creek	Winter	damage to private structures (homes, businesses),damage to public property (roads),flooded road crossings,flow of water across private property,backed up culverts and inlets,streams flowing in the floodplain (i.e. out of bank, within stream-side vegetated areas),minor erosion within a stream,any flow in a stream above normal levels,something else (please list)	Ice blockage and ice flows	Yes	Route 13 from TC3 and Lee Road, south to south branch Egypt Creek near Fire Station	2017	Flooded into Fire Station	Egypt Creek		damage to private structures (homes, businesses),displacement of people,damage to public property (roads),flooded road crossings,flow of water across private property,backed up culverts and inlets,streams flowing in the floodplain (i.e. out of bank, within stream-side vegetated areas),substantial erosion within a stream (incision),any flow in a stream above normal levels		No
R_3lQdx3CHe77A5SU	I agree to all of the above and wish to proceed	Local government leadership	loss of life,damage to private structures (homes, businesses),displacement of people,damage to vehicles,damage to public property (roads),flooded road crossings,flow of water across private property,backed up culverts and inlets,a loss of stream side vegetation & trees, streams flowing in the floodplain (i.e. out of bank, within stream side vegetated areas),,substantial erosion within a stream (i…		Yes		Triphammer and Route 13	2017	??	Ithaca Mall Parking Lots	Autumn I believe	damage to private structures (homes, businesses),damage to vehicles,damage to public property (roads),flooded road crossings,flow of water across private property,backed up culverts and inlets,a loss of stream-side vegetation & trees		No
R_VL7SiDI2VGYCYg1	I agree to all of the above and wish to proceed	Local government leadership	flooded road crossings,any flow in a stream above normal levels		I have a good understanding of flooding		Along Salmon Creek Road	spring 2017		streams leading to Slamon Creek		damage to private structures (homes, businesses),damage to public property (roads),flooded road crossings,flow of water across private property,backed up culverts and inlets,a loss of stream-side vegetation & trees,streams flowing in the floodplain (i.e. out of bank, within stream-side vegetated areas),substantial erosion within a stream (incision),any flow in a stream above normal levels		No
R_3O370Yz2pgTATMi	I agree to all of the above and wish to proceed	Local government leadership	loss of life,damage to private structures (homes, businesses),displacement of people,damage to vehicles,damage to public property (roads),flooded road crossings,flow of water across private property,backed up culverts and inlets,a loss of stream side vegetation & trees, streams flowing in the floodplain (i.e. out of bank, within stream side vegetated areas),,substantial erosion within a stream (i…		Yes		Banks Rd near Brooktondale Rd	Fall 2011		6 Mile Creek	fall, hurricane season	damage to public property (roads),flooded road crossings,a loss of stream-side vegetation & trees,streams flowing in the floodplain (i.e. out of bank, within stream-side vegetated areas),substantial erosion within a stream (incision)		No
R_12fFQGtERPOjKlG	I agree to all of the above and wish to proceed	Policy development	loss of life,damage to private structures (homes, businesses),displacement of people,damage to vehicles,damage to public property (roads),flooded road crossings,flow of water across private property,backed up culverts and inlets,a loss of stream side vegetation & trees, streams flowing in the floodplain (i.e. out of bank, within stream side vegetated areas),,substantial erosion within a stream (i…		Yes	Yes
R_1ohD8ZGW6KjlAdR	I agree to all of the above and wish to proceed	Policy development	loss of life,damage to private structures (homes, businesses),displacement of people,damage to vehicles,damage to public property (roads),flooded road crossings,flow of water across private property,a loss of stream side vegetation & trees, streams flowing in the floodplain (i.e. out of bank, within stream side vegetated areas),		I have a good understanding of flooding
R_RyjPefilXqFb1BL	I agree to all of the above and wish to proceed	Policy development	damage to private structures (homes, businesses),displacement of people,damage to public property (roads),flooded road crossings,flow of water across private property,a loss of stream side vegetation & trees, streams flowing in the floodplain (i.e. out of bank, within stream side vegetated areas),,substantial erosion within a stream (incision)		I have a good understanding of flooding		six mile creek					damage to public property (roads),flow of water across private property,backed up culverts and inlets,a loss of stream-side vegetation & trees,substantial erosion within a stream (incision)		No
R_ey3M8gLd1DfFEpH	I agree to all of the above and wish to proceed	Policy development	loss of life,damage to private structures (homes, businesses),displacement of people,damage to vehicles,damage to public property (roads),flooded road crossings,flow of water across private property,backed up culverts and inlets,a loss of stream side vegetation & trees, streams flowing in the floodplain (i.e. out of bank, within stream side vegetated areas),,substantial erosion within a stream (i…		Yes	Yes	Wegmans parking lot	Not sure, several times.		Small flood control stream that comes off Souh Hill	Summer	flow of water across private property,streams flowing in the floodplain (i.e. out of bank, within stream-side vegetated areas)		Yes	Fall Creek/Northside	Several times--don't know dates		Fall Creek/Cascadilla Creek	Winter	damage to private structures (homes, businesses),flooded road crossings,flow of water across private property,backed up culverts and inlets,any flow in a stream above normal levels		No
R_2YfaClyKiGjIHmH	I agree to all of the above and wish to proceed	Policy development	damage to private structures (homes, businesses),displacement of people,damage to vehicles,damage to public property (roads),flooded road crossings,backed up culverts and inlets,a loss of stream side vegetation & trees, streams flowing in the floodplain (i.e. out of bank, within stream side vegetated areas),		Yes		Lower Cascadilla Creek	Winter 2012		Cascadilla Creek	Winter	damage to private structures (homes, businesses),displacement of people,damage to vehicles,flooded road crossings,flow of water across private property		Yes	Fall Creek/Northside neighborhoods	Fall 2011		Fall Creek	Autumn	damage to private structures (homes, businesses),flooded road crossings,flow of water across private property,backed up culverts and inlets		No
R_vJjEDN7qM1z2Uet	I agree to all of the above and wish to proceed	Public advocacy	displacement of people,damage to vehicles,damage to public property (roads),flooded road crossings,flow of water across private property,backed up culverts and inlets,a loss of stream side vegetation & trees, streams flowing in the floodplain (i.e. out of bank, within stream side vegetated areas),,substantial erosion within a stream (incision)		I have a good understanding of flooding	Yes
R_RUNi9HFY2DYQWMp	I agree to all of the above and wish to proceed	Public advocacy	damage to private structures (homes, businesses),displacement of people,damage to vehicles,damage to public property (roads),flooded road crossings,flow of water across private property,backed up culverts and inlets,a loss of stream side vegetation & trees, streams flowing in the floodplain (i.e. out of bank, within stream side vegetated areas),,substantial erosion within a stream (incision)		I have a good understanding of flooding		South side and Fall Creek area of Ithaca city	Don't recall	Don't know	6 mile creek and	Spring	damage to private structures (homes, businesses),damage to public property (roads),flooded road crossings,flow of water across private property,backed up culverts and inlets		No
R_2uNFECLhf0ErIgq	I agree to all of the above and wish to proceed	Public advocacy	loss of life,damage to private structures (homes, businesses),displacement of people,damage to vehicles,damage to public property (roads),flooded road crossings,flow of water across private property,backed up culverts and inlets,any flow in a stream above normal levels		Yes									No
R_27mwlxrqURWkip5	I agree to all of the above and wish to proceed	Public advocacy	loss of life,damage to private structures (homes, businesses),displacement of people,damage to vehicles,damage to public property (roads),flooded road crossings,flow of water across private property,backed up culverts and inlets,a loss of stream side vegetation & trees, streams flowing in the floodplain (i.e. out of bank, within stream side vegetated areas),,substantial erosion within a stream (i…		I have a good understanding of flooding		Downtown Ithaca	1981-10-01		Cascadilla Creek, Six Mile Creek, Cayuga Inlet, Fall Creek	Fall	damage to private structures (homes, businesses),displacement of people,damage to public property (roads),flooded road crossings,flow of water across private property,backed up culverts and inlets,a loss of stream-side vegetation & trees,streams flowing in the floodplain (i.e. out of bank, within stream-side vegetated areas)		Yes	Lansing, NY	1996-01-01		Salmon Creek	Winter	damage to private structures (homes, businesses),damage to vehicles,damage to public property (roads),flooded road crossings,flow of water across private property,backed up culverts and inlets,a loss of stream-side vegetation & trees,streams flowing in the floodplain (i.e. out of bank, within stream-side vegetated areas),substantial erosion within a stream (incision),any flow in a stream above no…		No
R_1ohbVGE7ZCUcLuv	I agree to all of the above and wish to proceed	Public advocacy	loss of life,damage to private structures (homes, businesses),displacement of people,damage to vehicles,damage to public property (roads),flooded road crossings,backed up culverts and inlets,a loss of stream side vegetation & trees, streams flowing in the floodplain (i.e. out of bank, within stream side vegetated areas),,substantial erosion within a stream (incision)		Yes	Yes	Near IHS and Stewart Park	?? 4 years ago		Fall creek? creek out of Ithaca Falls	winter/spring	flooded road crossings,backed up culverts and inlets,a loss of stream-side vegetation & trees,streams flowing in the floodplain (i.e. out of bank, within stream-side vegetated areas)		No
R_SPiw47Ns62eEn8R	I agree to all of the above and wish to proceed	Public advocacy	loss of life,damage to private structures (homes, businesses),displacement of people,damage to vehicles,damage to public property (roads),flooded road crossings,backed up culverts and inlets,a loss of stream side vegetation & trees, streams flowing in the floodplain (i.e. out of bank, within stream side vegetated areas),,substantial erosion within a stream (incision)		No		widespread, but water crossed NY79 at our house, 1520 Slaterville Road	About 1977 or 1978		4 inches rain in 1 hour affected every hillside and stream	August, on a Sunday afternoon	damage to private structures (homes, businesses),displacement of people,damage to public property (roads),flooded road crossings,flow of water across private property,backed up culverts and inlets,a loss of stream-side vegetation & trees,streams flowing in the floodplain (i.e. out of bank, within stream-side vegetated areas),substantial erosion within a stream (incision)		Yes	whole county	About 1970?		Hurricane Agnes hit everywhere	July	damage to private structures (homes, businesses),displacement of people,damage to vehicles,damage to public property (roads),flooded road crossings,flow of water across private property,backed up culverts and inlets,a loss of stream-side vegetation & trees,streams flowing in the floodplain (i.e. out of bank, within stream-side vegetated areas),substantial erosion within a stream (incision)		Yes	whole vicinity	1954-10-01		Hurricane Hazel hit everywhere	October	damage to private structures (homes, businesses),displacement of people,damage to vehicles,damage to public property (roads),flooded road crossings,flow of water across private property,backed up culverts and inlets,a loss of stream-side vegetation & trees,streams flowing in the floodplain (i.e. out of bank, within stream-side vegetated areas),substantial erosion within a stream (incision)		No
R_2zd7RqAmdK8sgJH	I agree to all of the above and wish to proceed	Public advocacy	loss of life,damage to private structures (homes, businesses),displacement of people,damage to vehicles,damage to public property (roads),flooded road crossings,flow of water across private property,backed up culverts and inlets,a loss of stream side vegetation & trees, streams flowing in the floodplain (i.e. out of bank, within stream side vegetated areas),		Yes		newfield, west danby, spencer	a few years ago--2015?		area wide	summer	damage to private structures (homes, businesses),displacement of people,damage to vehicles,damage to public property (roads),flooded road crossings,flow of water across private property,backed up culverts and inlets,a loss of stream-side vegetation & trees,streams flowing in the floodplain (i.e. out of bank, within stream-side vegetated areas),substantial erosion within a stream (incision)		No
R_1C2xRLlPYEYkJnY	I agree to all of the above and wish to proceed	Public advocacy
R_30hDXnJcqM6gmOo	I agree to all of the above and wish to proceed	Public advocacy
R_vlEhbiY5fwsPJGp	I agree to all of the above and wish to proceed	Research / Engineering / Environmental Science	any flow in a stream above normal levels		I have a good understanding of flooding	Yes	No	No	No	No	No	any flow in a stream above normal levels		No
R_1oiOzOOLbl1B3op	I agree to all of the above and wish to proceed	Research / Engineering / Environmental Science	loss of life,damage to private structures (homes, businesses),displacement of people,damage to public property (roads),flooded road crossings,backed up culverts and inlets,a loss of stream side vegetation & trees, streams flowing in the floodplain (i.e. out of bank, within stream side vegetated areas),,substantial erosion within a stream (incision)		I have a good understanding of flooding		town of newfield	2015		Cayuga Inlet, Pony Hollow	Spring	damage to private structures (homes, businesses),displacement of people,damage to public property (roads),flooded road crossings,backed up culverts and inlets,a loss of stream-side vegetation & trees,substantial erosion within a stream (incision)		No
R_3MfFmRDY59nzp6s	I agree to all of the above and wish to proceed	Research / Engineering / Environmental Science	loss of life,damage to private structures (homes, businesses),displacement of people,damage to vehicles,damage to public property (roads),flooded road crossings,flow of water across private property,a loss of stream side vegetation & trees, streams flowing in the floodplain (i.e. out of bank, within stream side vegetated areas),,substantial erosion within a stream (incision)		I have a good understanding of flooding	Yes	Freeville	1930s		fall Creek	summer	damage to private structures (homes, businesses),damage to public property (roads),flooded road crossings,flow of water across private property,backed up culverts and inlets,streams flowing in the floodplain (i.e. out of bank, within stream-side vegetated areas)		No
R_QgCdzuav1JAPhlL	I agree to all of the above and wish to proceed	Research / Engineering / Environmental Science	damage to vehicles	flow above an n-yr recurrence interval	Yes	Yes								No
R_24reXxMgpHolNEn	I agree to all of the above and wish to proceed	Research / Engineering / Environmental Science	loss of life,damage to private structures (homes, businesses),displacement of people,damage to vehicles,damage to public property (roads),flooded road crossings,flow of water across private property,backed up culverts and inlets,a loss of stream side vegetation & trees, streams flowing in the floodplain (i.e. out of bank, within stream side vegetated areas),		Yes	Yes
R_DT3Vn4a6W2GRgsx	I agree to all of the above and wish to proceed	Research / Engineering / Environmental Science	Other (explain)	A flood is defined as flow greater than bankful-which also has a precise definition	I have a good understanding of flooding
R_3Mfk9CfeU08Xaym	I agree to all of the above and wish to proceed	Research / Engineering / Environmental Science	loss of life,damage to private structures (homes, businesses),displacement of people,damage to vehicles,damage to public property (roads),flooded road crossings		I have a good understanding of flooding	No	Ithaca High School	2018-01-12	1.8 m	Fall Creek	Winter	loss of life,damage to public property (roads),flooded road crossings		No
R_2TLFUDyT50dsYk9	I agree to all of the above and wish to proceed	Research / Engineering / Environmental Science	loss of life,damage to private structures (homes, businesses),displacement of people,damage to vehicles,damage to public property (roads),flooded road crossings,backed up culverts and inlets		Yes	Yes	Walmart and nearby parking lots	around 1976		Inlet and Fall Creek	End of Winter	damage to private structures (homes, businesses),damage to vehicles,damage to public property (roads),flooded road crossings,flow of water across private property,backed up culverts and inlets,any flow in a stream above normal levels		No
R_25Z1n9r1xi7kyZ4	I agree to all of the above and wish to proceed	Research / Engineering / Environmental Science	loss of life,damage to private structures (homes, businesses),displacement of people,damage to vehicles,damage to public property (roads),flooded road crossings,flow of water across private property,backed up culverts and inlets,a loss of stream side vegetation & trees, streams flowing in the floodplain (i.e. out of bank, within stream side vegetated areas),,substantial erosion within a stream (i…		I have a good understanding of flooding	Yes						minor erosion within a stream		No
R_1LtBBIllVwuyVe4	I agree to all of the above and wish to proceed	Research / Engineering / Environmental Science	Other (explain)	A flood is defined as flow exceeding the bank full channel	I have a good understanding of flooding	No	Sixmile at German Crossroad	August,1976	? Flooded our garage and greenhouse	Sixmile	Summer	flooded road crossings,flow of water across private property,a loss of stream-side vegetation & trees,streams flowing in the floodplain (i.e. out of bank, within stream-side vegetated areas),substantial erosion within a stream (incision),any flow in a stream above normal levels		Yes	Sixmile at german Crossrd	Sept 7/8,2011	don't know what you mean	Sixmile	Fall-remnants of Lee	flow of water across private property,a loss of stream-side vegetation & trees,streams flowing in the floodplain (i.e. out of bank, within stream-side vegetated areas),substantial erosion within a stream (incision),any flow in a stream above normal levels,something else (please list)	Channel on verge of avulsing	No
R_ZBSORg909U1Q6Q1	I agree to all of the above and wish to proceed	Research / Engineering / Environmental Science	Other (explain)	temporary flow outside of bankfull into the floodplain	I have a good understanding of flooding		Dey or Auburn and Franklin Street in City of Ithaca	winter 2014		cascadilla creek	winter due to ice jams under bridges, caused localized flooding when stream water elevations exceeded catch basin elevations	damage to private structures (homes, businesses),flooded road crossings,flow of water across private property,backed up culverts and inlets,minor erosion within a stream		No
[truncated: 366 more columns]
